# Supplementary material for: Sequential Infection of Aedes aegypti Mosquitoes with Chikungunya Virus and Zika Virus Enhances Early Zika Virus Transmission
Source: PubMed Central journal article supplement (PMC6315929; doi:10.3390/insects9040177), 2018-12-01
Supplement: insects-09-00177-s001.pdf [file insects-09-00177-s001.pdf]

Article

# Sequential Infection of *Aedes aegypti* Mosquitoes with Chikungunya Virus and Zika Virus Enhances Early Zika Virus Transmission

Tereza Magalhaes \*, Alexis Robison, Michael C. Young, William C. Black IV, Brian D. Foy, Gregory D. Ebel and Claudia Rückert \*

Arthropod-Borne and Infectious Diseases Laboratory, Department of Microbiology, Immunology, and Pathology, Colorado State University, Fort Collins, CO 80523, USA; lexic5394@gmail.com (A.R.); emceeyoung@gmail.com (M.C.Y.); William.Black@colostate.edu (W.C.B.I.); Brian.Foy@colostate.edu (B.F.); Gregory.Ebel@colostate.edu (G.D.E.)

\* Correspondence: Tereza.Magalhaes@colostate.edu (T.M.); Claudia.Rueckert@Colostate.edu (C.R.); Tel.: +1-970-491-5699 (T.M.); +1-970-491-2202 (C.R.)

Received: 26 October 2018; Accepted: 27 November 2018; Published: date

## Supplementary

**Table S1.** Raw data of virus positive tissues from individual replicate experiments, including results of a Chi-Square test to determine heterogeneity among replicates (indicated by *p*-value).

| Replicate    | Treatment <sup>1</sup> | Tissue     | N infected | N negative | N total | <i>p</i> -value            | % infected |
|--------------|------------------------|------------|------------|------------|---------|----------------------------|------------|
| <b>7 dpi</b> |                        |            |            |            |         |                            |            |
| 1            | UZ                     | bodies     | 22         | 1          | 23      | 1.00                       | 95.7%      |
| 2            | UZ                     | bodies     | 18         | 0          | 18      |                            | 100.0%     |
| 3            | UZ                     | bodies     | 23         | 1          | 24      |                            | 95.8%      |
| 1            | UZ                     | legs/wings | 19         | 4          | 23      | 0.914                      | 82.6%      |
| 2            | UZ                     | legs/wings | 15         | 3          | 18      |                            | 83.3%      |
| 3            | UZ                     | legs/wings | 21         | 3          | 24      |                            | 87.5%      |
| 1            | UZ                     | saliva     | 1          | 22         | 23      | 0.631                      | 4.3%       |
| 2            | UZ                     | saliva     | 0          | 18         | 18      |                            | 0.0%       |
| 3            | UZ                     | saliva     | 0          | 24         | 24      |                            | 0.0%       |
| 1            | UC                     | bodies     | 28         | 0          | 28      | 1.00                       | 100.0%     |
| 2            | UC                     | bodies     | 19         | 0          | 19      |                            | 100.0%     |
| 3            | UC                     | bodies     | 25         | 0          | 25      |                            | 100.0%     |
| 1            | UC                     | legs/wings | 28         | 0          | 28      | 1.00                       | 100.0%     |
| 2            | UC                     | legs/wings | 19         | 0          | 19      |                            | 100.0%     |
| 3            | UC                     | legs/wings | 25         | 0          | 25      |                            | 100.0%     |
| 1            | UC                     | saliva     | 15         | 13         | 28      | 0.116                      | 53.6%      |
| 2            | UC                     | saliva     | 11         | 8          | 19      |                            | 57.9%      |
| 3            | UC                     | saliva     | 20         | 5          | 25      |                            | 80.0%      |
| 1            | ZU                     | bodies     | 25         | 6          | 31      | <b>0.00730<sup>2</sup></b> | 80.6%      |
| 2            | ZU                     | bodies     | 29         | 0          | 29      |                            | 100.0%     |
| 3            | ZU                     | bodies     | 20         | 0          | 20      |                            | 100.0%     |
| 1            | ZU                     | legs/wings | 25         | 6          | 31      | <b>0.0230<sup>2</sup></b>  | 80.6%      |
| 2            | ZU                     | legs/wings | 29         | 0          | 29      |                            | 100.0%     |
| 3            | ZU                     | legs/wings | 19         | 1          | 20      |                            | 95.0%      |
| 1            | ZU                     | saliva     | 8          | 23         | 31      | 0.218                      | 25.8%      |
| 2            | ZU                     | saliva     | 11         | 18         | 29      |                            | 37.9%      |

|               |      |            |    |    |    |                               |        |
|---------------|------|------------|----|----|----|-------------------------------|--------|
| 3             | ZU   | saliva     | 3  | 17 | 20 |                               | 15.0%  |
| 1             | CU   | bodies     | 32 | 0  | 32 | 1.00                          | 100.0% |
| 2             | CU   | bodies     | 22 | 0  | 22 |                               | 100.0% |
| 3             | CU   | bodies     | 29 | 0  | 29 |                               | 100.0% |
| 1             | CU   | legs/wings | 31 | 1  | 32 | 1.00                          | 96.9%  |
| 2             | CU   | legs/wings | 22 | 0  | 22 |                               | 100.0% |
| 3             | CU   | legs/wings | 29 | 0  | 29 |                               | 100.0% |
| 1             | CU   | saliva     | 21 | 11 | 32 | <b>0.00570<sup>2</sup></b>    | 65.6%  |
| 2             | CU   | saliva     | 5  | 17 | 22 |                               | 22.7%  |
| 3             | CU   | saliva     | 17 | 12 | 29 |                               | 58.6%  |
| 1             | ZC-c | bodies     | 26 | 0  | 26 | 1.00                          | 100.0% |
| 2             | ZC-c | bodies     | 22 | 0  | 22 |                               | 100.0% |
| 3             | ZC-c | bodies     | 26 | 0  | 26 |                               | 100.0% |
| 1             | ZC-c | legs/wings | 24 | 2  | 26 | 0.326                         | 92.3%  |
| 2             | ZC-c | legs/wings | 22 | 0  | 22 |                               | 100.0% |
| 3             | ZC-c | legs/wings | 26 | 0  | 26 |                               | 100.0% |
| 1             | ZC-c | saliva     | 21 | 5  | 26 | <b>0.0323<sup>2</sup></b>     | 80.8%  |
| 2             | ZC-c | saliva     | 11 | 11 | 22 |                               | 50.0%  |
| 3             | ZC-c | saliva     | 13 | 13 | 26 |                               | 50.0%  |
| 1             | ZC-z | bodies     | 20 | 6  | 26 | <b>0.0410<sup>2</sup></b>     | 76.9%  |
| 2             | ZC-z | bodies     | 22 | 0  | 22 |                               | 100.0% |
| 3             | ZC-z | bodies     | 22 | 4  | 26 |                               | 84.6%  |
| 1             | ZC-z | legs/wings | 20 | 6  | 26 | <b>0.0428<sup>2</sup></b>     | 76.9%  |
| 2             | ZC-z | legs/wings | 22 | 0  | 22 |                               | 100.0% |
| 3             | ZC-z | legs/wings | 21 | 5  | 26 |                               | 80.8%  |
| 1             | ZC-z | saliva     | 14 | 12 | 26 | <b>0.0352<sup>2</sup></b>     | 53.8%  |
| 2             | ZC-z | saliva     | 18 | 4  | 22 |                               | 81.8%  |
| 3             | ZC-z | saliva     | 12 | 14 | 26 |                               | 46.2%  |
| 1             | CZ-c | bodies     | 33 | 1  | 34 | 1.00                          | 97.1%  |
| 2             | CZ-c | bodies     | 30 | 0  | 30 |                               | 100.0% |
| 3             | CZ-c | bodies     | 29 | 0  | 29 |                               | 100.0% |
| 1             | CZ-c | legs/wings | 33 | 1  | 34 | 0.762                         | 97.1%  |
| 2             | CZ-c | legs/wings | 30 | 0  | 30 |                               | 100.0% |
| 3             | CZ-c | legs/wings | 28 | 1  | 29 |                               | 96.6%  |
| 1             | CZ-c | saliva     | 18 | 16 | 34 | 0.604                         | 52.9%  |
| 2             | CZ-c | saliva     | 18 | 12 | 30 |                               | 60.0%  |
| 3             | CZ-c | saliva     | 19 | 10 | 29 |                               | 65.5%  |
| 1             | CZ-z | bodies     | 32 | 2  | 34 | 0.772                         | 94.1%  |
| 2             | CZ-z | bodies     | 29 | 1  | 30 |                               | 96.7%  |
| 3             | CZ-z | bodies     | 29 | 0  | 29 |                               | 100.0% |
| 1             | CZ-z | legs/wings | 27 | 7  | 34 | 0.0673                        | 79.4%  |
| 2             | CZ-z | legs/wings | 29 | 1  | 30 |                               | 96.7%  |
| 3             | CZ-z | legs/wings | 27 | 2  | 29 |                               | 93.1%  |
| 1             | CZ-z | saliva     | 2  | 32 | 34 | <b>&lt;0.0001<sup>2</sup></b> | 5.9%   |
| 2             | CZ-z | saliva     | 5  | 25 | 30 |                               | 16.7%  |
| 3             | CZ-z | saliva     | 16 | 13 | 29 |                               | 55.2%  |
| <b>12 dpi</b> |      |            |    |    |    |                               |        |
| 1             | UZ   | bodies     | 18 | 0  | 18 | 1.00                          | 100.0% |
| 2             | UZ   | bodies     | 16 | 0  | 16 |                               | 100.0% |
| 3             | UZ   | bodies     | 10 | 0  | 10 |                               | 100.0% |
| 1             | UZ   | legs/wings | 18 | 0  | 18 | 1.00                          | 100.0% |
| 2             | UZ   | legs/wings | 15 | 1  | 16 |                               | 93.8%  |
| 3             | UZ   | legs/wings | 10 | 0  | 10 |                               | 100.0% |
| 1             | UZ   | saliva     | 6  | 12 | 18 | 0.306                         | 33.3%  |

|   |      |            |    |    |    |                      |        |
|---|------|------------|----|----|----|----------------------|--------|
| 2 | UZ   | saliva     | 2  | 14 | 16 |                      | 12.5%  |
| 3 | UZ   | saliva     | 1  | 9  | 10 |                      | 10.0%  |
| 1 | UC   | bodies     | 23 | 0  | 23 | 1.00                 | 100.0% |
| 2 | UC   | bodies     | 14 | 0  | 14 |                      | 100.0% |
| 3 | UC   | bodies     | 5  | 0  | 5  |                      | 100.0% |
| 1 | UC   | legs/wings | 23 | 0  | 23 | 1.00                 | 100.0% |
| 2 | UC   | legs/wings | 14 | 0  | 14 |                      | 100.0% |
| 3 | UC   | legs/wings | 5  | 0  | 5  |                      | 100.0% |
| 1 | UC   | saliva     | 11 | 12 | 23 | 0.824                | 47.8%  |
| 2 | UC   | saliva     | 5  | 9  | 14 |                      | 35.7%  |
| 3 | UC   | saliva     | 2  | 3  | 5  |                      | 40.0%  |
| 1 | ZU   | bodies     | 24 | 0  | 24 | 1.00                 | 100.0% |
| 2 | ZU   | bodies     | 27 | 1  | 28 |                      | 96.4%  |
| 3 | ZU   | bodies     | 3  | 0  | 3  |                      | 100.0% |
| 1 | ZU   | legs/wings | 24 | 0  | 24 |                      | 100.0% |
| 2 | ZU   | legs/wings | 27 | 1  | 28 |                      | 96.4%  |
| 3 | ZU   | legs/wings | 3  | 0  | 3  |                      | 100.0% |
| 1 | ZU   | saliva     | 12 | 12 | 24 | 0.00871 <sup>2</sup> | 50.0%  |
| 2 | ZU   | saliva     | 17 | 11 | 28 |                      | 60.7%  |
| 3 | ZU   | saliva     | 3  | 0  | 3  |                      | 100.0% |
| 1 | CU   | bodies     | 23 | 0  | 23 | 1.00                 | 100.0% |
| 2 | CU   | bodies     | 22 | 0  | 22 |                      | 100.0% |
| 3 | CU   | bodies     | 14 | 0  | 14 |                      | 100.0% |
| 1 | CU   | legs/wings | 23 | 0  | 23 | 1.00                 | 100.0% |
| 2 | CU   | legs/wings | 22 | 0  | 22 |                      | 100.0% |
| 3 | CU   | legs/wings | 14 | 0  | 14 |                      | 100.0% |
| 1 | CU   | saliva     | 12 | 11 | 23 | 0.0385 <sup>2</sup>  | 52.2%  |
| 2 | CU   | saliva     | 4  | 18 | 22 |                      | 18.2%  |
| 3 | CU   | saliva     | 3  | 11 | 14 |                      | 21.4%  |
| 1 | ZC-c | bodies     | 25 | 0  | 25 | 1.00                 | 100.0% |
| 2 | ZC-c | bodies     | 21 | 0  | 21 |                      | 100.0% |
| 3 | ZC-c | bodies     | 7  | 0  | 7  |                      | 100.0% |
| 1 | ZC-c | legs/wings | 25 | 0  | 25 | 1.00                 | 100.0% |
| 2 | ZC-c | legs/wings | 21 | 0  | 21 |                      | 100.0% |
| 3 | ZC-c | legs/wings | 7  | 0  | 7  |                      | 100.0% |
| 1 | ZC-c | saliva     | 18 | 7  | 25 | 0.329                | 72.0%  |
| 2 | ZC-c | saliva     | 15 | 6  | 21 |                      | 71.4%  |
| 3 | ZC-c | saliva     | 3  | 4  | 7  |                      | 42.9%  |
| 1 | ZC-z | bodies     | 22 | 3  | 25 | 0.350                | 88.0%  |
| 2 | ZC-z | bodies     | 21 | 0  | 21 |                      | 100.0% |
| 3 | ZC-z | bodies     | 7  | 0  | 7  |                      | 100.0% |
| 1 | ZC-z | legs/wings | 22 | 3  | 25 | 0.350                | 88.0%  |
| 2 | ZC-z | legs/wings | 21 | 0  | 21 |                      | 100.0% |
| 3 | ZC-z | legs/wings | 7  | 0  | 7  |                      | 100.0% |
| 1 | ZC-z | saliva     | 11 | 14 | 25 | 0.167                | 44.0%  |
| 2 | ZC-z | saliva     | 14 | 7  | 21 |                      | 66.7%  |
| 3 | ZC-z | saliva     | 2  | 5  | 7  |                      | 28.6%  |
| 1 | CZ-c | bodies     | 27 | 0  | 27 | 1.00                 | 100.0% |
| 2 | CZ-c | bodies     | 20 | 0  | 20 |                      | 100.0% |
| 3 | CZ-c | bodies     | 5  | 0  | 5  |                      | 100.0% |
| 1 | CZ-c | legs/wings | 27 | 0  | 27 | 0.481                | 100.0% |
| 2 | CZ-c | legs/wings | 19 | 1  | 20 |                      | 95.0%  |
| 3 | CZ-c | legs/wings | 5  | 0  | 5  |                      | 100.0% |
| 1 | CZ-c | saliva     | 14 | 13 | 27 | 0.110                | 51.9%  |

|   |      |            |    |    |    |       |        |
|---|------|------------|----|----|----|-------|--------|
| 2 | CZ-c | saliva     | 9  | 11 | 20 |       | 45.0%  |
| 3 | CZ-c | saliva     | 0  | 5  | 5  |       | 0.0%   |
| 1 | CZ-z | bodies     | 26 | 1  | 27 | 0.185 | 96.3%  |
| 2 | CZ-z | bodies     | 20 | 0  | 20 |       | 100.0% |
| 3 | CZ-z | bodies     | 4  | 1  | 5  |       | 80.0%  |
| 1 | CZ-z | legs/wings | 26 | 1  | 27 | 0.318 | 96.3%  |
| 2 | CZ-z | legs/wings | 19 | 1  | 20 |       | 95.0%  |
| 3 | CZ-z | legs/wings | 4  | 1  | 5  |       | 80.0%  |
| 1 | CZ-z | saliva     | 5  | 22 | 27 | 1.00  | 18.5%  |
| 2 | CZ-z | saliva     | 4  | 16 | 20 |       | 20.0%  |
| 3 | CZ-z | saliva     | 1  | 4  | 5  |       | 20.0%  |

<sup>1</sup> For explanation of groups see Figure 1. Added “-c” and “-z” indicate whether reported infection rates refer to CHIKV or ZIKV positivity in these groups, respectively; <sup>2</sup> *p*-values below 0.05 indicate significant variation between replicate experiments for the respective group/tissue. This variation is common in vector competence experiments and not overly concerning. Some variation was found due to a low N at 12 dpi in replicate 3 (low mosquito survival) or lower infection rates following the first blood feed of replicate 1.
